# Supplementary material for: Development and Initial Validation of the Schedule for Nonadaptive and Adaptive Personality Brief Other-Description Rating Form (SNAP-BORF)
Source: Springer Nature journal article supplement (doi:10.1007/s10862-019-09729-y), 2019-03-04
Supplement: MOESM1 [file 16522750]

Table A

*Bivariate Correlations between the SNAP-SRF and the SNAP-ORF Scales*

SNAP-SRF

SNAP-ORF NT MIS MAN SFH AGG EP DEP PT ENT EXH DET DIS IMP PRO WRK

NT **.32*****†** .06 .07 .15 .11 .10 .07 -.03 .17 .05 -.04 -.04 -.04 .05 -.06

MIS .10 .17* .10 .14 .06 -.05 -.10 -.18 .09 -.04 .01 .06 .04 -.07 -.22†

MAN .03 .03 .28* .10 .20 -.01 -.05 -.02 .17 **.36†** -.16 **.34** **.35†** -.19 **-.32**

SFH .12 .07 .20 .22† .09 -.01 .03 -.21† -.02 -.01 .01 .13 .10 -.08 -.20

AGG .19 .12 .10 .00 **.42*****†** -.10 -.07 .11 .19 .24 -.06 .23 .09 -.11 -.23

EP -.08 -.03 .01 .01 -.06 .13*† -.14† -.05 .02 -.06 .03 .13† .06 -.04 -.13†

DEP -.01 -.10 .01 .07 -.16 .08 **.31*****†** -.04 -.09 .01 -.02 -.04 .11 .08 -.08

PT -.14 -.15 -.17 **-.35*** -.11 -.08 -.07 **.40*****†** -.02 .22 **-.31*** -.03 .00 .11 .10

ENT .05 .04 .15 -.07 -.01 .01 -.11 -.06 .27*† .19 .01 .06 .14 .03 -.02

EXH -.06 -.12 .13 -.13 -.01 -.09 -.10 .15 .24 **.42*****†** -.30* .22 .19 -.06 -.12

DET .16 .11 .17 .22 .06 .07 -.04 -.29† .06 -.24 .28† .01 -.05 .08 -.11

DIS .01 .06 .25 .17 .25 .03 -.05 -.06 .05 .26 -.15 **.44*****†** **.40** -.25 **-.32**

IMP -.02 -.04 .21 .03 .18 .06 -.03 .08 .04 **.32** .21 **.45*****†** **.46***† **-.34 -.34***

PRO -.12 -.06 -.22 -.08 -.27 .02 .01 .03 -.05 -.19 .04 **-.40† -.38** **.38*** .19

WRK .06 -.01 -.13 -.10 -.11 -.13* -.03 .08 -.07 -.23 .11 **-.31 -.37†** .20 .29

Note: Assuming significance at *p* ≤.05 and applying a Bonferroni correction, we focused on interpreting *r*s ≥|.31|that were significant at *p* ≤.0002; these correlations (> |.31|) are **bolded.** Convergent correlations (between analogous scales) are underlined; * = highest correlation in column (within ± .01); † = highest correlation in row (within ± .01); SNAP = Schedule for Nonadaptive and Adaptive Personality; SRF = Self-Description Rating Form; ORF = Other-Description Rating Form; NT = negative temperament; MIS = mistrust; MAN = manipulativeness; SFH = self-harm; AGG = aggression; EP =eccentric perceptions; DEP = dependency; PT = positive temperament; ENT = entitlement; EXH = exhibitionism; DET = detachment; DIS = disinhibition vs. constraint; IMP = impulsivity; PRO = propriety; WRK = workaholism.

Table B

*Bivariate Correlations between the SNAP-BSRF and the SNAP-BORF Scales*

SNAP-BSRF

SNAP-BORF NT MIS MAN SFH AGG EP DEP PT ENT EXH DET DIS IMP PRO WRK

NT **.35***† .25 .08 .18 .12 .10 .01 -.18 .01 -.01 .10 -.06 -.06 .07 .18

MIS .24 .29*† .20 .24 .16 .13 -.08 -.24 -.02 -.06 .17 .08 .09 -.07 .06

MAN .16 .06 .26 .12 .18 .02 .01 -.11 .07 .23 -.08 **.37†** **.37†** -.21 -.21

SFH **.32** .30* .26 **.40*****†** .04 .18 -.01 -.27 -.01 -.01 .18 .16 .14 .08 .03

AGG .23 .10 .13 .14 **.32†** .02 -.10 .07 .03 .19 .02 .25 .25 -.14 -.05

EP -.04 .02 -.05 -.01 -.04 .09 -.26*† -.20 -.01 -.05 .19 -.08 -.04 .02 -.05

DEP .05 -.09 .03 .19 -.28† -.07 .27*† -.16 -.10 -.04 .03 .01 .03 .11 -.14

PT -.18 -.21 -.23 -.29 -.08 -.08 .01 **.42*****†** .08 .14 -.20 -.13 -.10 .13 .10

ENT -.07 .03 .08 -.02 -.03 .11 -.19 .01 .26*† .12 -.07 .06 .10 -.04 -.08

EXH -.12 -.06 .06 -.08 .01 -.18 -.02 .11 .26* **.34*****†** -.29 .22 .21 -.11 -.20

DET **.31†** .29 .24 .26 .23 .15 -.01 -.28 -.06 -.22 **.31*****†** .04 -.06 -.09 .17

DIS .04 -.06 .24 .12 .20 .04 -.05 -.12 .03 .28 -.16 **.48*****†** **.41 -.32 -.41***

IMP .08 -.06 .28 .10 .21 .03 .03 -.14 .08 **.33*** -.14 **.43** **.47*****†** **-.31 -.36**

PRO -.26 -.15 **-.32*** -.16 **-.34*** -.19* -.01 .13 -.05 -.28 -.01 **-.48*****†** **-.45** **.40*** .13

WRK .12 .15 -.05 .01 -.03 -.06 -.06 .10 .04 -.18 .22 **-.36 -.34** .25 **.39†**

Note: Assuming significance at *p* ≤.05 and applying a Bonferroni correction, we focused on interpreting *r*s ≥|.31|that were significant at *p* ≤.0002; these correlations (> |.31|) are **bolded.** Convergent correlations (between analogous scales) are underlined; * = highest correlation in column (within ± .01); † = highest correlation in row (within ± .01); SNAP = Schedule for Nonadaptive and Adaptive Personality; BSRF = Brief Self-Description Rating Form; BORF = Brief Other-Description Rating Form; NT = negative temperament; MIS = mistrust; MAN = manipulativeness; SFH = self-harm; AGG = aggression; EP =eccentric perceptions; DEP = dependency; PT = positive temperament; ENT = entitlement; EXH = exhibitionism; DET = detachment; DIS = disinhibition vs. constraint; IMP = impulsivity; PRO = propriety; WRK = workaholism.

Table C

*Two-Factor EFA Solutions for the 15 scales of the SNAP-ORF and -BORF*

SNAP-ORF SNAP-BORF

NA Disinhibition NA Disinhibition

Scales vs. Low PA vs. Constraint vs. Low PA vs. Constraint

DET **0.76** -0.23 **0.62** -0.24

MIS **0.64** 0.02 **0.81** -0.05

NT **0.62** 0.01 **0.71** 0.00

SFH **0.54** 0.24 **0.67** 0.16

EP 0.310.13 0.24 0.00

PT **-0.71** 0.03 **-0.65** -0.10

DIS 0.01 **0.91** 0.01 **0.89**

IMP -0.18 **0.83** -0.04 **0.89**

MAN 0.22 **0.74** 0.32 **0.67**

EXH -0.27 **0.40** -0.13 0.38

AGG 0.25 0.31 0.39 0.31

WRK 0.02 **-0.67** 0.16 **-0.69**

PRO -0.01 **-0.54** -0.19 **-0.62**

DEP 0.06 0.14 0.13 0.14

ENT 0.27 0.18 0.320.16

*Note.* SNAP = Schedule for Nonadaptive and Adaptive Personality; ORF = Other-description Rating Form; B = Brief; all primary loadings were significant at *p* < .05; loadings ≥ |.40| are **bolded**; NA = negative affectivity; PA= positive affectivity; DET = detachment; MIS = mistrust; NT = negative temperament; SFH = self-harm; EP =eccentric perceptions; PT = positive temperament; DIS = disinhibition; IMP = impulsivity; MAN = manipulativeness; EXH = exhibitionism; AGG = aggression; WRK = workaholism; PRO = propriety; DEP = dependency; ENT = entitlement.

Table D

*Four-Factor EFA Solutions for the 15 scales of the SNAP-ORF and -BORF*

SNAP-ORF SNAP-BORF

NA Disinhibition NA/ NA Disinhibition

Scales vs. Low PA vs. Constraint Antagonism Dependency vs. Low PA vs. Constraint Antagonism Dependency

DET **0.82** -0.05 0.00 -0.20 **0.78** -0.01 -0.02 -0.29

MIS **0.55** 0.06 0.21 -0.04 **0.63** 0.01 0.330.00

NT **0.48** -0.06 0.360.19 **0.44** -0.06 **0.47** 0.12

SFH **0.48** 0.24 0.06 **0.40 0.53** 0.14 0.25 0.29

PT **-0.80** -0.18 0.18 -0.02 **-0.74** -0.26 0.02 -0.02

EXH **-0.58** 0.08 **0.67** 0.04 **-0.55** 0.10 **0.53** 0.17

DIS -0.07 **0.91** 0.01 -0.03 -0.08 **0.88** 0.00 -0.02

IMP -0.25 **0.80** 0.01 -0.06 -0.14 **0.88** -0.01 -0.04

MAN 0.02 **0.63** 0.370.08 0.03 **0.59** 0.390.04

AGG 0.13 0.30 0.31 -0.350.10 0.27 **0.46** -0.25

WRK -0.02 **-0.76** 0.28 -0.16 -0.01 **-0.82 0.44** -0.15

PRO 0.03 **-0.60** -0.01 0.25 -0.01 **-0.64** -0.23 0.30

ENT 0.00 -0.06 **0.77** -0.05 -0.14 -0.07 **0.77** -0.02

DEP 0.00 0.03 0.02 **0.58** 0.08 0.01 0.05 **0.56**

EP 0.26 0.14 0.12 0.02 0.11 -0.03 0.26 -0.07

*Note.* SNAP = Schedule for Nonadaptive and Adaptive Personality; ORF = Other-description Rating Form; B = Brief; all primary loadings were significant at *p* < .05; loadings ≥ |.40| are **bolded**; NA = negative affectivity; PA= positive affectivity; DET = detachment; MIS = mistrust; NT = negative temperament; SFH = self-harm; PT = positive temperament; EXH = exhibitionism; DIS = disinhibition; IMP = impulsivity; MAN = manipulativeness; AGG = aggression; WRK = workaholism; PRO = propriety; ENT = entitlement; DEP = dependency; EP =eccentric perceptions.

Table E

*Five-Factor EFA Solutions for the 15 scales of the SNAP-ORF and -BORF*

SNAP-ORF SNAP-BORF

Aggression/ Entitled Detachment Aggression/ Entitled

Scales NA DvC PA LowDep. Exhibitionism NA DvC Low PA LowDep. Exhibitionism

NT **0.86 -0.40** -0.03 0.03 0.03 **0.96** -0.320.05 0.01 -0.02

SFH **0.66** 0.05 -0.15 -0.27 -0.06 **0.52** 0.08 0.29 -0.23 0.00

DEP 0.380.00 0.19 **-0.49** 0.03 0.26 0.02 -0.11 **-0.52** 0.05

AGG 0.320.06 0.02 **0.59** 0.01 **0.60** 0.06 -0.08 **0.50** 0.02

DIS 0.06 **0.88** 0.02 0.07 0.05 0.05 **0.85** -0.07 0.07 -0.02

IMP -0.01 **0.77** 0.17 0.08 0.05 -0.01 **0.87** -0.09 0.08 -0.01

MAN 0.22 **0.58** 0.02 -0.02 0.340.12 **0.59** 0.06 -0.01 0.33

WRK 0.05 **-0.78** 0.11 0.15 0.06 0.07 **-0.83** 0.00 0.12 0.34

PRO 0.00 **-0.52** 0.03 -0.29 0.06 -0.03 **-0.61** -0.11 -0.28 -0.13

PT -0.12 -0.14 **0.74** 0.02 0.02 -0.03 -0.32 **-0.77** 0.15 -0.02

EXH 0.26 0.02 **0.66** 0.03 0.360.03 0.12 **-0.50** -0.06 **0.51**

DET 0.02 -0.07 **-0.79** 0.16 0.09 0.01 0.00 **0.83** 0.16 -0.06

MIS 0.24 -0.02 **-0.43** 0.06 0.15 0.38-0.05 **0.50** -0.01 0.11

ENT -0.05 -0.01 -0.03 -0.01 **0.99** -0.05 -0.03 -0.02 0.01 **0.89**

EP 0.08 0.12 -0.23 -0.03 0.20 -0.07 0.00 0.19 0.02 0.31

*Note.* SNAP = Schedule for Nonadaptive and Adaptive Personality; ORF = Other-description Rating Form; B = Brief; all primary loadings were significant at *p* < .05; loadings ≥ |.40| are **bolded**; NA = negative affectivity; DvC = Disinhibition versus Constraint; PA= positive affectivity; LowDep. = Low Dependency; NT = negative temperament; SFH = self-harm; DEP = dependency; AGG = aggression; DIS = disinhibition; IMP = impulsivity; MAN = manipulativeness; WRK = workaholism; PRO = propriety; PT = positive temperament; EXH = exhibitionism; DET = detachment; MIS = mistrust; ENT = entitlement; EP =eccentric perceptions.

Table F

*Bivariate Associations Between the SNAP-ORF and -BORF Factor Scales*

SNAP-BORF

SNAP-ORF NA/Low PA DvC Antagonism

NA/Low PA **.91***† -.07 .23

DvC -.17 **.92***† **.38**

Antagonism .12 **.32** **.81***†

*Note.* Correlations > |.17| are significant at *p* < .05; *r*s > |.21| are significant at *p* < .01. Correlations of at least moderate effect size (> |.30|) are **bolded.** Convergent correlations (between analogous scales) are presented along the diagonal. * = highest correlation in column (within ± .01); † = highest correlation in row (within ± .01); *† and underlined = highest correlation in its respective column and row at *p <* .05. SNAP = Schedule for Nonadaptive and Adaptive Personality; ORF = Other-description Rating Form; B = Brief; NA = negative affectivity; PA= positive affectivity; DvC = disinhibition versus constraint.
